# Supplementary material for: Preparation and characterization of a multistimuli-responsive photoluminescent monomer and its corresponding polymer
Source: Royal Society of Chemistry journal article supplement (doi:10.1039/c8py01372a), 2018-01-01
Supplement: c8py01372a1.pdf [file c8py01372a1.pdf]

## Electronic supplementary information

### Preparation and Characterization of Multistimuli-responsive Photoluminescent Monomer and Its Corresponding Polymer

Qiangjun Li, Yongjie Yuan, Lifang He, Shenglan Liu, Hailiang Zhang\*

Key Laboratory of Polymeric Materials and Application Technology of Hunan Province, Key Laboratory of Advanced Functional Polymer Materials of Colleges and Universities of Hunan Province, College of Chemistry, Xiangtan University, Xiangtan 411105, Hunan Province, China.  
E-mail: hailiangzhang@xtu.edu.cn

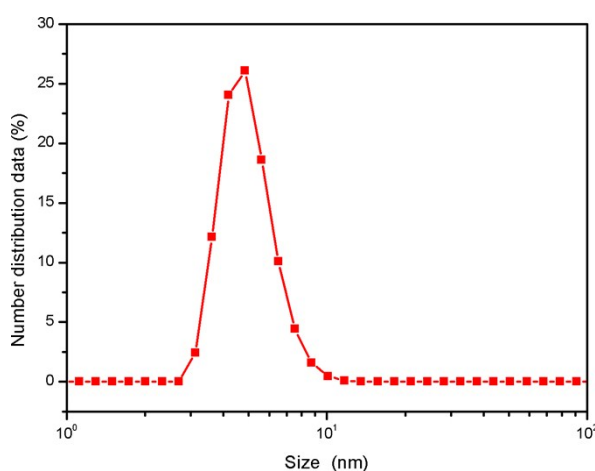

**Fig. S1** Distributions of size of monomer MTEO3PVPCN micelle; Concentration = 5 mg/mL.

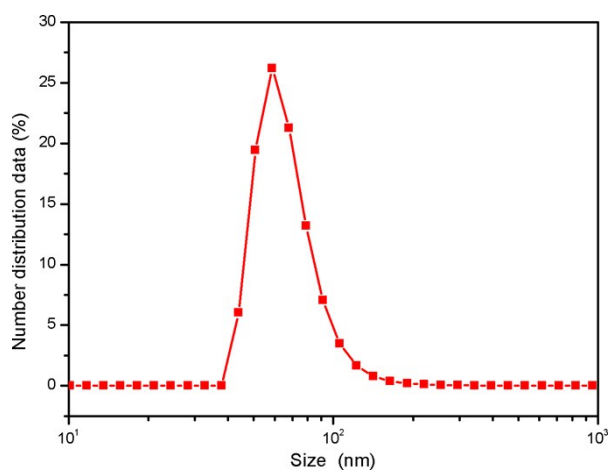

**Fig. S2** Distributions of size of polymer PMTEO3PVPCN micelle; Concentration = 5 mg/mL.
